# Supplementary figures and images for: Effect of chain extenders with different functionalities on the properties of single-component waterborne polyurethane ink binders
Source: Royal Society of Chemistry journal article supplement (doi:10.1039/d2ra02707k), 2022-01-01

Support information

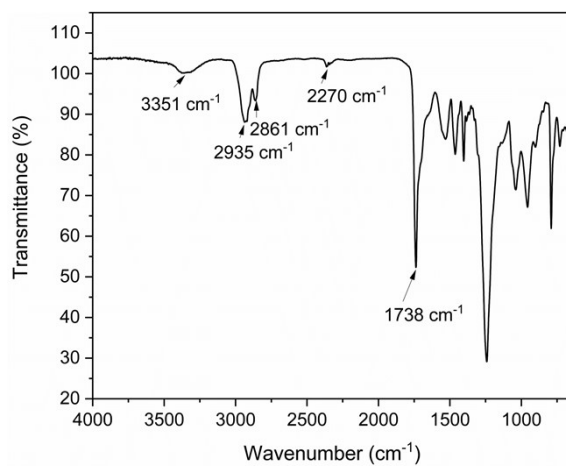

Figure S1 Infrared spectra of WPU prepolymer.

Supplement: d2ra02707k1.pdf [file d2ra02707k1.pdf]
